# Supplementary material for: Relation of Dietary n-3 and n-6 Fatty Acid Intakes to Metabolic Syndrome in Middle-Aged People Depending on the Level of HbA1c: A Review of National Health and Nutrition Survey Data from 2014 to 2016
Source: MDPI journal article supplement (doi:10.3390/medicina58081017), 2022-07-29
Supplement: s1 [file s1]

**Table S1.** Multivariate-adjusted odds ratios and 95% confidence intervals for the interactions between MetS and HbA1c groups (normal, high) according to n-3 and n-6 fatty acid intakes and gender.

| Odds Ratio— — HbA1c <6.5 |       |                  |                  |       | Odds Ratio— — HbA1c ≥6.5 |                    |  |
|--------------------------|-------|------------------|------------------|-------|--------------------------|--------------------|--|
| Tertiles of PUFA intake  |       |                  |                  |       | Tertiles of PUFA intake  |                    |  |
| Men                      | 1     | 2                | 3                | 1     | 2                        | 3                  |  |
| Participants (n)         | 1656  |                  |                  | 219   |                          |                    |  |
| <b>n-6 Fatty Acid</b>    |       |                  |                  |       |                          |                    |  |
| Range of intake(g/day)   | <6.43 | 6.43—10.14       | >10.14           | <6.43 | 6.43—10.14               | >10.14             |  |
| Crude                    | 1     | 0.50 (0.42—0.60) | 0.55 (0.47—0.66) | 1     | 2.19 (1.31—3.67)         | 2.37 (1.39—4.05)   |  |
| Model 1                  | 1     | 0.82 (0.64—1.04) | 0.88 (0.70—1.12) | 1     | 0.65 (0.32—1.32)         | 0.73 (0.36—1.49)   |  |
| Model 2                  | 1     | 0.94 (0.73—1.21) | 1.08 (0.83—1.40) | 1     | 0.61 (0.30—1.27)         | 0.64 (0.30—1.40)   |  |
| Model 3                  | 1     | 0.87 (0.65—1.16) | 0.88 (0.57—1.36) | 1     | 0.59 (0.23—1.50)         | 0.70 (0.15—3.17)   |  |
| <b>n-3 Fatty Acid</b>    |       |                  |                  |       |                          |                    |  |
| Range of intake(g/day)   | <0.87 | 0.87—1.40        | >1.40            | <0.87 | 0.87—1.40                | >1.40              |  |
| Crude                    | 1     | 0.45 (0.38—0.54) | 0.58 (0.49—0.69) | 1     | 1.80 (1.10—2.94)         | 2.77 (1.59—4.82)   |  |
| Model 1                  | 1     | 0.70 (0.55—0.89) | 0.89 (0.71—1.12) | 1     | 0.47 (0.23—0.97)         | 0.76 (0.36—1.60)   |  |
| Model 2                  | 1     | 0.83 (0.64—1.07) | 1.06 (0.82—1.36) | 1     | 0.45 (0.22—0.94)         | 0.70 (0.32—1.56)   |  |
| Model 3                  | 1     | 0.74 (0.56—0.99) | 0.81 (0.54—1.21) | 1     | 0.41 (0.17—0.99)         | 0.77 (0.20—3.00)   |  |
| <b>n-6/n-3 Ratio</b>     |       |                  |                  |       |                          |                    |  |
| Range of intake          | <6.89 | 6.89—7.80        | >7.80            | <6.89 | 6.89—7.80                | >7.80              |  |
| Crude                    | 1     | 0.48 (0.40—0.57) | 0.55 (0.47—0.66) | 1     | 2.48 (1.49—4.11)         | 3.92 (2.13—7.21)   |  |
| Model 1                  | 1     | 0.73 (0.58—0.93) | 0.86 (0.68—1.08) | 1     | 1.15 (0.59—2.25)         | 1.83 (0.87—3.86)   |  |
| Model 2                  | 1     | 0.84 (0.65—1.08) | 0.91 (0.71—1.16) | 1     | 1.23 (0.62—2.44)         | 1.93 (0.90—4.13)   |  |
| Model 3                  | 1     | 0.89 (0.68—1.16) | 0.99 (0.73—1.33) | 1     | 2.08 (0.92—4.71)         | 4.96 (1.73 -14.26) |  |
| Women                    | 1     | 2                | 3                | 1     | 2                        | 3                  |  |
| Participants (n)         | 2754  |                  |                  | 223   |                          |                    |  |
| <b>n-6 Fatty Acid</b>    |       |                  |                  |       |                          |                    |  |
| Range of intake(g/day)   | <5.62 | 5.62—8.93        | >8.93            | <5.62 | 5.62—8.93                | >8.93              |  |
| Crude                    | 1     | 0.31 (0.26—0.36) | 0.23 (0.19—0.27) | 1     | 3.70 (2.00—6.82)         | 3.93 (2.19—7.06)   |  |
| Model 1                  | 1     | 0.56 (0.46—0.68) | 0.40 (0.33—0.49) | 1     | 0.73 (0.32—1.63)         | 0.76 (0.35—1.69)   |  |
| Model 2                  | 1     | 0.77 (0.62—0.95) | 0.64 (0.51—0.80) | 1     | 0.92 (0.38—2.23)         | 1.07 (0.43—2.67)   |  |
| Model 3                  | 1     | 0.84 (0.66—1.08) | 0.78 (0.52—1.15) | 1     | 1.12 (0.38—3.28)         | 1.46 (0.28—7.62)   |  |

| <b>n-3 Fatty Acid</b>                                                                                                                                |       |                  |                  |       |                  |                  |
|------------------------------------------------------------------------------------------------------------------------------------------------------|-------|------------------|------------------|-------|------------------|------------------|
| Range of intake(g/day)                                                                                                                               | <0.8  | 0.80—1.29        | >1.29            | <0.8  | 0.80—1.29        | >1.29            |
| Crude                                                                                                                                                | 1     | 0.30 (0.26—0.35) | 0.24 (0.21—0.29) | 1     | 4.17 (2.22—7.82) | 4.00 (2.23—7.19) |
| Model 1                                                                                                                                              | 1     | 0.55 (0.45—0.67) | 0.44 (0.36—0.55) | 1     | 0.87 (0.38—1.98) | 0.82 (0.37—1.82) |
| Model 2                                                                                                                                              | 1     | 0.77 (0.62—0.95) | 0.69 (0.55—0.86) | 1     | 1.11 (0.46—2.70) | 1.08 (0.45—2.59) |
| Model 3                                                                                                                                              | 1     | 0.85 (0.67—1.09) | 0.84 (0.59—1.21) | 1     | 1.32 (0.45—3.86) | 1.28 (0.30—5.49) |
| <b>n-6/n-3 Ratio</b>                                                                                                                                 |       |                  |                  |       |                  |                  |
| Range of intake                                                                                                                                      | <6.56 | 6.56—7.5         | >7.50            | <6.56 | 6.56—7.5         | >7.50            |
| Crude                                                                                                                                                | 1     | 0.27 (0.23—0.31) | 0.32 (0.28—0.37) | 1     | 3.12 (1.81—5.38) | 3.86 (2.14—6.94) |
| Model 1                                                                                                                                              | 1     | 0.55 (0.45—0.68) | 0.65 (0.53—0.79) | 1     | 0.48 (0.21—1.09) | 0.65 (0.29—1.48) |
| Model 2                                                                                                                                              | 1     | 0.75 (0.60—0.93) | 0.90 (0.73—1.11) | 1     | 0.65 (0.27—1.57) | 0.99 (0.40—2.47) |
| Model 3                                                                                                                                              | 1     | 0.79 (0.63—0.99) | 1.03 (0.80—1.32) | 1     | 0.66 (0.27—1.65) | 1.09 (0.39—3.09) |
| Adjusted for:                                                                                                                                        |       |                  |                  |       |                  |                  |
| Model 1: age                                                                                                                                         |       |                  |                  |       |                  |                  |
| Model 2: Model 1 + smoking status, alcohol use frequency, education level, employment status, lowest income quartile, and physical activity          |       |                  |                  |       |                  |                  |
| Model 3: Model 2 + Daily intakes: energy, carbohydrates, protein, saturated fatty acids, monounsaturated fatty acids, cholesterol, and dietary fiber |       |                  |                  |       |                  |                  |
